# Supplementary material
Source: publisher figshare collection journal article supplement (https://asha.figshare.com/articles/dataset/_/25452142)
Supplement: Supplementary file 1 [file 1]

**Supplemental Material S4.** Transcriptions of stories told by a native English speaker (NE) and a nonnative English speaker (NNE), and retellings of these stories by each listener. The text is color-coded for hesitation types. See S3 Table for the corresponding color-coded hesitation taxonomy and definitions.

## Speakers telling stories

### Speaker 1: native English (NE)

|                                                                                                                                                                                                                                                                                                                                                                                                                                                                                                                                                                                                                                                                                                                                                                                                                                                                                                                                                                                                                                                                                                                                                                                                                                                                            |              |           |               |               |            |
|----------------------------------------------------------------------------------------------------------------------------------------------------------------------------------------------------------------------------------------------------------------------------------------------------------------------------------------------------------------------------------------------------------------------------------------------------------------------------------------------------------------------------------------------------------------------------------------------------------------------------------------------------------------------------------------------------------------------------------------------------------------------------------------------------------------------------------------------------------------------------------------------------------------------------------------------------------------------------------------------------------------------------------------------------------------------------------------------------------------------------------------------------------------------------------------------------------------------------------------------------------------------------|--------------|-----------|---------------|---------------|------------|
| NE_Story_1.wav                                                                                                                                                                                                                                                                                                                                                                                                                                                                                                                                                                                                                                                                                                                                                                                                                                                                                                                                                                                                                                                                                                                                                                                                                                                             | 99 seconds   | 222 words | 311 syllables | 8 hesitations |            |
| Twenty-twenty was the year of COVID. My family and I went on a short vacation in May of twenty-twenty. My wife, Lynn, my son, Ethan, and my other son, Gavin. We rented an SUV and drove down to West Virginia. We wanted to be close to home and somewhere outside so we wouldn't be around a large number of people considering that COVID was rampant. We arrived in Logan, West Virginia and set up our tent. We went hiking <b>our-</b> the first day as soon as we got there. We went to a trail called Rattlesnake Trail. We hiked about two miles in and turned around and was hiking back out and encountered a rattlesnake along the trail. He was pretty docile. <b>Uh</b> he did rattle at us but, <b>umm</b> , it was interesting. We also went and rented the SUVs. <b>Umm</b> , the SUVs would probably go <b>up-</b> upwards of thirty to forty miles an hour. It rained just before we took those out. We hit some really large puddles and just had a really, really fun time as a family. It was really awesome. <b>Umm</b> , on another hike we encountered a box turtle <b>[laughs]</b> . We picked him up and <b>kind of</b> saved him from this rocky area where he was at. Overall, it was really relaxing and just being in nature was fantastic. |              |           |               |               |            |
| Filler words                                                                                                                                                                                                                                                                                                                                                                                                                                                                                                                                                                                                                                                                                                                                                                                                                                                                                                                                                                                                                                                                                                                                                                                                                                                               | Filler other | Nonspeech | Self-monitor  | Uptalk        | POV switch |
| 4                                                                                                                                                                                                                                                                                                                                                                                                                                                                                                                                                                                                                                                                                                                                                                                                                                                                                                                                                                                                                                                                                                                                                                                                                                                                          | 1            | 1         | 2             | 0             | 0          |

|                                                                                                                                                                                                                                                                                                                                                                                                                                                                                                                                                                                                                                                                                                                                                                                                                                                                                                                                                                                                                                                                                                                                                                                                                                                                                                                                                                                                                                                                                          |              |           |               |                |            |
|------------------------------------------------------------------------------------------------------------------------------------------------------------------------------------------------------------------------------------------------------------------------------------------------------------------------------------------------------------------------------------------------------------------------------------------------------------------------------------------------------------------------------------------------------------------------------------------------------------------------------------------------------------------------------------------------------------------------------------------------------------------------------------------------------------------------------------------------------------------------------------------------------------------------------------------------------------------------------------------------------------------------------------------------------------------------------------------------------------------------------------------------------------------------------------------------------------------------------------------------------------------------------------------------------------------------------------------------------------------------------------------------------------------------------------------------------------------------------------------|--------------|-----------|---------------|----------------|------------|
| NE_Story_2.wav                                                                                                                                                                                                                                                                                                                                                                                                                                                                                                                                                                                                                                                                                                                                                                                                                                                                                                                                                                                                                                                                                                                                                                                                                                                                                                                                                                                                                                                                           | 105 seconds  | 272 words | 348 syllables | 10 hesitations |            |
| <p>My s- oldest son, Ethan, just had his thirteenth birthday. I surprised him on his thirteenth birthday with a go-kart that a neighbor had. The neighbor had umm, not wanted to sell me the go-kart for about six months because it was run- wasn't running. It needed umm, some work done to the carburetor. [2-second silence] Anyway, the neighbor's garage door was broken one day, and I saw him carrying his lawn mower—his push lawn mower—outside through his front door; walked over to the neighbor and just asked him what in the world he was doing [laughs] carrying his lawn mower through the house out the front door. He went and proceeded to tell me that the garage door was broken. I told him I knew a guy who could help and fix his garage door. I called the guy and later that day, the guy I know umm, came out and fixed his garage door for him for a really good price and really quickly. The neighbor was really happy and just happened to come over and tell me about it, how happy was, how pleased he was, and uh, he offered the go-kart to me even though it wasn't fixed yet. He said he'd- he offered it to me for thirty dollars. And I said, "yeah, I'm happy to buy the go-kart from you." I fixed the carburetor on the go-kart, and my son was just thrilled to have a go-kart. Him and his buddies have ridden it around the neighborhood and just had a lot of fun. I think it was uh maybe the best thirty dollars I've ever spent.</p> |              |           |               |                |            |
| Filler words                                                                                                                                                                                                                                                                                                                                                                                                                                                                                                                                                                                                                                                                                                                                                                                                                                                                                                                                                                                                                                                                                                                                                                                                                                                                                                                                                                                                                                                                             | Filler other | Nonspeech | Self-monitor  | Uptalk         | POV switch |
| 5                                                                                                                                                                                                                                                                                                                                                                                                                                                                                                                                                                                                                                                                                                                                                                                                                                                                                                                                                                                                                                                                                                                                                                                                                                                                                                                                                                                                                                                                                        | 0            | 2         | 3             | 0              | 0          |

|                                                                                                                                                                                                                                                                                                                                                                                                                                                                                                                                                                                                                                                                                                                                                                                                                                                                                                                                                                                                                                                                                                                                                                                                              |              |           |               |                |            |
|--------------------------------------------------------------------------------------------------------------------------------------------------------------------------------------------------------------------------------------------------------------------------------------------------------------------------------------------------------------------------------------------------------------------------------------------------------------------------------------------------------------------------------------------------------------------------------------------------------------------------------------------------------------------------------------------------------------------------------------------------------------------------------------------------------------------------------------------------------------------------------------------------------------------------------------------------------------------------------------------------------------------------------------------------------------------------------------------------------------------------------------------------------------------------------------------------------------|--------------|-----------|---------------|----------------|------------|
| NE_Story_3.wav                                                                                                                                                                                                                                                                                                                                                                                                                                                                                                                                                                                                                                                                                                                                                                                                                                                                                                                                                                                                                                                                                                                                                                                               | 93 seconds   | 224 words | 285 syllables | 12 hesitations |            |
| <p>I remember a time when I was twelve years old. Me and a couple of buddies took off. We had heard that there was a place called Elizabeth’s Grave and supposedly Elizabeth’s Grave was a place where there were umm, these evil spirits. So, we had a desire to be scared. So [laughs] we snuck out, all of us snuck out, and met. One night, about midnight or one—I don’t know exactly what time it was but—we met, and we took off. It’s- it was quite a ways away from our house, so we had to walk down this set of train tracks to Elizabeth’s Grave. So, we’re walking down there and it’s pretty bright moon light—I don’t know, maybe even a full moon that night—but we’re walking down there to Elizabeth’s Grave, and um, we arrive and we see the grave site. We see a little house off in the distance where supposedly Elizabeth lived and supposedly, she was- she was killed um by her stepfather. And while we were there, umm, all of the sudden, we- [laughs] we saw a ghost, we saw a spirit, we saw something, we don’t know exactly what it was but, anyway we got really scared, and all of us took off like right away, we just took off running. We were really freaked out.</p> |              |           |               |                |            |
| Filler words                                                                                                                                                                                                                                                                                                                                                                                                                                                                                                                                                                                                                                                                                                                                                                                                                                                                                                                                                                                                                                                                                                                                                                                                 | Filler other | Nonspeech | Self-monitor  | Uptalk         | POV switch |
| 4                                                                                                                                                                                                                                                                                                                                                                                                                                                                                                                                                                                                                                                                                                                                                                                                                                                                                                                                                                                                                                                                                                                                                                                                            | 3            | 2         | 3             | 0              | 0          |

## Speaker 2: nonnative English (NNE)

|                                                                                                                                                                                                                                                                                                                                                                                                                                                                                                                                                                                                                                                                                                                                                                                                                                                                                                                                                                                                                                                                                                                                                                                                                                                                      |              |           |               |                |            |
|----------------------------------------------------------------------------------------------------------------------------------------------------------------------------------------------------------------------------------------------------------------------------------------------------------------------------------------------------------------------------------------------------------------------------------------------------------------------------------------------------------------------------------------------------------------------------------------------------------------------------------------------------------------------------------------------------------------------------------------------------------------------------------------------------------------------------------------------------------------------------------------------------------------------------------------------------------------------------------------------------------------------------------------------------------------------------------------------------------------------------------------------------------------------------------------------------------------------------------------------------------------------|--------------|-----------|---------------|----------------|------------|
| NNE_Story_1.wav                                                                                                                                                                                                                                                                                                                                                                                                                                                                                                                                                                                                                                                                                                                                                                                                                                                                                                                                                                                                                                                                                                                                                                                                                                                      | 108 seconds  | 223 words | 297 syllables | 27 hesitations |            |
| Okay. Let me talk about my story. Umm, I had a very difficulty with getting to university. When I was in high school, Korea, there is a lot of- there was pretty difficult, umm the university entrance exam and then, like I decide to- umm, to study by myself and I quit high school. And then- and then I prepare for that exam like using the academic- the academic like which helps for that and then. But actually, I failed twice to get to the university that I want. And I gave it three- third shot and then I just got the [2-second silence, clicks tongue] admission to the- from the school that umm, I kind of felt okay but I did not—I expected more than that. So, what I learned from that was, yeah, I- I- I don't want to be more greedy that- than that. I mean, that the university is like pres- prestigious or less pres- prest- prestigious actually does not matter much, but uh I spent too much time to get that. Three years that I spent [2-second silence, clicks tongue] is something that I regret the most in my lifetime. So after that is fine, but umm, still that two years, three years—like from the nineteen to twenty-two years old—I just really miss that. Now I- I might do better, something better or meaningful. |              |           |               |                |            |
| Filler words                                                                                                                                                                                                                                                                                                                                                                                                                                                                                                                                                                                                                                                                                                                                                                                                                                                                                                                                                                                                                                                                                                                                                                                                                                                         | Filler other | Nonspeech | Self-monitor  | Uptalk         | POV switch |
| 6                                                                                                                                                                                                                                                                                                                                                                                                                                                                                                                                                                                                                                                                                                                                                                                                                                                                                                                                                                                                                                                                                                                                                                                                                                                                    | 8            | 2         | 11            | 0              | 0          |

|                                                                                                                                                                                                                                                                                                                                                                                                                                                                                                                                                                                                                                                                                                                                                                                                                                                                                                                                                                                                                                                                                                                                                                                                        |              |           |               |                |            |
|--------------------------------------------------------------------------------------------------------------------------------------------------------------------------------------------------------------------------------------------------------------------------------------------------------------------------------------------------------------------------------------------------------------------------------------------------------------------------------------------------------------------------------------------------------------------------------------------------------------------------------------------------------------------------------------------------------------------------------------------------------------------------------------------------------------------------------------------------------------------------------------------------------------------------------------------------------------------------------------------------------------------------------------------------------------------------------------------------------------------------------------------------------------------------------------------------------|--------------|-----------|---------------|----------------|------------|
| NNE_Story_2.wav                                                                                                                                                                                                                                                                                                                                                                                                                                                                                                                                                                                                                                                                                                                                                                                                                                                                                                                                                                                                                                                                                                                                                                                        | 108 seconds  | 215 words | 284 syllables | 14 hesitations |            |
| <p>Hmm, I served the military service for two years and then that was the luckiest chance that I ever had. Umm the two years of military service is bad; it sucks. But um luckily, I could work with the US troops. I was kind of augmented to them. And then I learned some English and then, umm I- I'm kind of familiarized with those cultures and things like that. And then after that I could [2-second silence, clicks tongue] uh try to go to the exchange student, which was fun. And I met my girlfriend there, and I'm still dating with her. And then, I could had research- research experience there. And then I get some reco- letter of recommendation there too. And then, by doing so I could, umm, apply for the grad school United States. And then, I can work in my lab, which I really like, and our- the advisor's really good. And then finally, it's already been five years to study in this country, and Ohio State, my lab, and I'm ready to graduate in December. But I got to make a dissertation defense soon. And then, after that I hopefully going to work the company. And then, I'm not sure, can just make it or not, but umm, I'm trying my best, kind of.</p> |              |           |               |                |            |
| Filler words                                                                                                                                                                                                                                                                                                                                                                                                                                                                                                                                                                                                                                                                                                                                                                                                                                                                                                                                                                                                                                                                                                                                                                                           | Filler other | Nonspeech | Self-monitor  | Uptalk         | POV switch |
| 6                                                                                                                                                                                                                                                                                                                                                                                                                                                                                                                                                                                                                                                                                                                                                                                                                                                                                                                                                                                                                                                                                                                                                                                                      | 3            | 1         | 4             | 0              | 0          |

|                                                                                                                                                                                                                                                                                                                                                                                                                                                                                                                                                                                                                                                                                                                                                                                                                                                                                                                                                                                                                                                                                                                                                                                                                                                                                                                                                                                                                                                                                                                      |              |           |               |                |            |
|----------------------------------------------------------------------------------------------------------------------------------------------------------------------------------------------------------------------------------------------------------------------------------------------------------------------------------------------------------------------------------------------------------------------------------------------------------------------------------------------------------------------------------------------------------------------------------------------------------------------------------------------------------------------------------------------------------------------------------------------------------------------------------------------------------------------------------------------------------------------------------------------------------------------------------------------------------------------------------------------------------------------------------------------------------------------------------------------------------------------------------------------------------------------------------------------------------------------------------------------------------------------------------------------------------------------------------------------------------------------------------------------------------------------------------------------------------------------------------------------------------------------|--------------|-----------|---------------|----------------|------------|
| NNE_Story_3.wav                                                                                                                                                                                                                                                                                                                                                                                                                                                                                                                                                                                                                                                                                                                                                                                                                                                                                                                                                                                                                                                                                                                                                                                                                                                                                                                                                                                                                                                                                                      | 160 seconds  | 278 words | 336 syllables | 28 hesitations |            |
| Umm, there was umm, old king in- like in nineteen-fifties. Umm, there's no king in Korea, but there was, and they had- um he had three child. First one was big, huge, athletic, but was kind of greedy. And the second son was [2-second silence, clicks tongue] smart, but um he just don't have any interest in real life. He just are interested in religion and the histories and he's kind of like more scholar type. And third- third son was the- the smartest one, and he knows, and he feels it and he has a great feeling of politics, things like that. And then, so the king wants to give his umm, authority and his hierarchy to third but um traditionally, um the kings get their king to the first son, not the second and third. So, there will be conflict if he gives his first one—uh third one. And- but he knows that the first one will not going to be a be a good king. So, what's your decision? Do you want to just give the- your petition as the best guy or do you just want to go follow the custom and try not to make a conflict? [2-second silence] Because the- the- the ability of king is important too. But umm what do you think? That- what do you think about it? [3-second silence] Sli- but uh I will decide three. I will give it to the third son but um, I don't think this is always the right way. And uh that I just don't want to ignore that. I- I just don't want to ignore the importance of custom. There's a reason why they are there [laughs]. Goodnight. |              |           |               |                |            |
| Filler words                                                                                                                                                                                                                                                                                                                                                                                                                                                                                                                                                                                                                                                                                                                                                                                                                                                                                                                                                                                                                                                                                                                                                                                                                                                                                                                                                                                                                                                                                                         | Filler other | Nonspeech | Self-monitor  | Uptalk         | POV switch |
| 12                                                                                                                                                                                                                                                                                                                                                                                                                                                                                                                                                                                                                                                                                                                                                                                                                                                                                                                                                                                                                                                                                                                                                                                                                                                                                                                                                                                                                                                                                                                   | 3            | 4         | 10            | 0              | 0          |

## Listeners retelling stories

### Listener 01: NE stories

|                |            |           |               |               |
|----------------|------------|-----------|---------------|---------------|
| NE_Story_1.wav | 67 seconds | 191 words | 257 syllables | 6 hesitations |
|----------------|------------|-----------|---------------|---------------|

So he was saying how twenty-twenty, it's year of COVID, and in May of twenty-twenty, him and his family—who was his wife Lynn, and his sons, Ethan and Gavin—they wanted to kind of get away from the large numbers of people, get somewhere that was still close to home but a little more outdoors, so they traveled to West Virginia for a little trip.

Umm they set up their tents, and they want to go hiking. They go hiking on a trail called Rattlesnake Trail, go in about two miles, turn around and come back, and actually did encounter a rattlesnake. But it was pretty calm, and it rattled at them. Umm, they said it was interesting and then continued on. They rented some SUVs, and it was raining, and they were splashing through puddles. They said it was really fun—got up to like thirty, forty miles an hour. Um went on another hike where they saw a box turtle, and they saved him from a little rocky area. Um and overall, it was just really fun and relaxing to be with the family and be with nature.

|              |              |           |              |        |            |
|--------------|--------------|-----------|--------------|--------|------------|
| Filler words | Filler other | Nonspeech | Self-monitor | Uptalk | POV switch |
| 4            | 2            | 0         | 0            | 0      | 0          |

|                |            |           |               |                |
|----------------|------------|-----------|---------------|----------------|
| NE_Story_2.wav | 70 seconds | 228 words | 285 syllables | 12 hesitations |
|----------------|------------|-----------|---------------|----------------|

Okay, so his son, Ethan, had his thirteenth birthday and his dad surprised him with a go-kart. Um he was trying to get the go-kart for six months uh but the neighbor—it was his neighbor's go-kart, I should say—but the neighbor wouldn't give it to him because it was busted; the carburetor was broken. So, it was just kind of sitting in his garage for six months, umm and then one day, that same neighbor's garage was broken. And, umm this man saw the neighbor carrying his push lawnmower through their front door and went over to ask what was up—cause that seems strange. And he proceeded to tell him that the garage door's broken. Umm so the guy said he knew someone who could fix it for him, called him up. Um he went over and fixed the neighbor's garage really quickly, for a really good price. So the neighbor was thrilled, umm came over to tell the dad how pleased he was, umm, and told him that he would give him the go-kart for um his son even though it was still broken. So, the dad fixed it up: umm got a new carburetor, fixed the carburetor, and gave it to his son for his birthday. And now him and his friends ride around the neighborhood and it's a whole lot of fun.

|              |              |           |              |        |            |
|--------------|--------------|-----------|--------------|--------|------------|
| Filler words | Filler other | Nonspeech | Self-monitor | Uptalk | POV switch |
| 10           | 1            | 0         | 0            | 0      | 1          |

|                |            |           |               |               |
|----------------|------------|-----------|---------------|---------------|
| NE_Story_3.wav | 53 seconds | 152 words | 200 syllables | 7 hesitations |
|----------------|------------|-----------|---------------|---------------|

So he was recalling a time when he was about twelve years old. And him and his buddies kind of wanted to get scared. They were looking for something [clicks tongue] for like a thrill of sorts. And they had heard of this place called Elizabeth's Grave? where allegedly there were spirits. Umm so they took off one night—pretty late, midnight, one in the morning—and went down. It was a little bit of a ways away. So cross the train tracks, get to Elizabeth's Grave, they're standing there, umm they see a house in the distance—which is allegedly where Elizabeth lived and was maybe killed by her stepfather. Umm, so they're down there and they swear they saw something—a ghost, a spirit, something like that. It really freaked them out um and they were so scared, and they all just took off running immediately and never really looked back [laughs].

|              |              |           |              |        |            |
|--------------|--------------|-----------|--------------|--------|------------|
| Filler words | Filler other | Nonspeech | Self-monitor | Uptalk | POV switch |
| 4            | 1            | 1         | 0            | 1      | 0          |

## Listener 01: NNE stories

|                 |            |           |               |                |
|-----------------|------------|-----------|---------------|----------------|
| NNE_Story_1.wav | 70 seconds | 225 words | 305 syllables | 18 hesitations |
|-----------------|------------|-----------|---------------|----------------|

So he said- he was talking about how he had a difficult time **um** getting into university. So, in high school—back in Korea, **I think—umm**, was having a tough time with that anyway. Ended up **umm** stopping high school, dropping out to focus on studying on the university **entran-** entrance exam **um** because it was pretty tough. And, he was working really hard to study for that—ended up taking it **um** a few times and **failed? three times?** or at least didn't get into the school that he wanted to **um** a couple of those times. So he kept working at it, studying to get a better grade to get into these universities **umm** and he finally did, but what he was saying was that he has a lot of regret, because he feels like he wasted some **time?** in his life. It was **like** from ages nineteen to twenty-two. **Um** and he feels like he could have done more things, better things, different things with his life **uh** during that time period. And he **kind of** learned something, that he didn't need to be greedy; it didn't really matter how prestigious or less prestigious the school was, **umm** that wasn't really what mattered and at the end of the day, he wished he would have spent that time doing something different.

| Filler words | Filler other | Nonspeech | Self-monitor | Uptalk | POV switch |
|--------------|--------------|-----------|--------------|--------|------------|
| 10           | 2            | 0         | 2            | 3      | 1          |

|                 |            |           |               |                |
|-----------------|------------|-----------|---------------|----------------|
| NNE_Story_2.wav | 69 seconds | 204 words | 280 syllables | 15 hesitations |
|-----------------|------------|-----------|---------------|----------------|

Okay so he said that he was in the military for two years **umm** and he feels really lucky. Those were **like** two of the luckiest years of his life. He said, it's **like** bad, and it sucks being in the military, but he was fortunate; **um** he was with US troops, so he actually ended up learning a lot of English, **umm** which then enabled him to apply to his exchange program successfully and become a successful exchange student. He met his girlfriend there, **umm** and they're still together, they're still dating. **Umm** he did research, **umm** and then through his research, that enabled him to make good connections where he could get a letter of recommendation and apply to grad school in the United States as well. **Um** so now he's been over here—I **think** he said at Ohio State—for five years. **Umm** he works in a lab that he really likes under an advisor that he really likes. **Umm** and so those have all been good things and now he's preparing for his **dissertation? um** before he graduates in December. And then after that, he's not sure yet; maybe work for a company of sorts **umm**, he doesn't know.

| Filler words | Filler other | Nonspeech | Self-monitor | Uptalk | POV switch |
|--------------|--------------|-----------|--------------|--------|------------|
| 11           | 2            | 0         | 0            | 1      | 1          |

|                 |            |           |               |                |
|-----------------|------------|-----------|---------------|----------------|
| NNE_Story_3.wav | 65 seconds | 211 words | 280 syllables | 13 hesitations |
|-----------------|------------|-----------|---------------|----------------|

Okay, so he said there was a king, **umm** maybe back in the nineteen-fifties. It's not a king in Korea now, but there was one for the purposes of this story. So, the king had three sons and the firstborn was big and athletic, but a little bit greedy. The second one **um** was very smart but didn't really have any interests in real life or that he could apply to life, so he really was just interested in religion and history. **Umm** and then the third son was probably the smartest of all of them. **Umm [clicks tongue]** I **guess** that second son was more scholarly but the third one **kind of** applied himself more and had a **like**, a strong interest in politics. **Umm** so the king really wanted to give his authority over to that third son but traditionally, you give it to the oldest—not the second or third—so he knew there would be conflict **um** if he were to give it to another son. **Umm**, so he **basically** just needed to make a decision. **Umm**, because he knew that the first one wouldn't be a good king. But what would happen if he gave it to the third son, there would be a whole bunch of problems.

| Filler words | Filler other | Nonspeech | Self-monitor | Uptalk | POV switch |
|--------------|--------------|-----------|--------------|--------|------------|
| 8            | 3            | 1         | 0            | 0      | 1          |

## Listener 02: NE stories

|                |            |           |               |                |
|----------------|------------|-----------|---------------|----------------|
| NE_Story_1.wav | 63 seconds | 157 words | 207 syllables | 10 hesitations |
|----------------|------------|-----------|---------------|----------------|

Umm in twenty-twenty, the year of COVID, the speaker and his family—his wife and his two kids (think one kid's name was Ethan and the other kid's name was like Yemen or Yabu...something like that). So they all went to West Virginia. Umm they wanted to be in a more secluded area because of COVID umm and they set up camp there. Umm they just went hiking; they went on a trail called the Rattlesnake Trail. And on the way back from their two-mile hike, umm they encountered an actual rattlesnake who was docile, and it rattled at them. Umm on another trail that they went on, they saw a box turtle and they saved him from a rocky area? Umm, they rented some SUVs on their trip, and it rained before they took out the SUV so they hit some puddles. Umm and overall, the narrator said that they had a very good, relaxing time.

| Filler words | Filler other | Nonspeech | Self-monitor | Uptalk | POV switch |
|--------------|--------------|-----------|--------------|--------|------------|
| 8            | 1            | 0         | 0            | 1      | 1          |

|                |            |           |               |               |
|----------------|------------|-----------|---------------|---------------|
| NE_Story_2.wav | 75 seconds | 211 words | 275 syllables | 9 hesitations |
|----------------|------------|-----------|---------------|---------------|

The speaker tells a story about how he- umm well, it was his son's birthday recently, and he had gifted his son a go-kart that was- that previously had belonged to his neighbor. Umm and at first his neighbor didn't want to sell him the go-kart because it was broken. Umm, so, one day, the speaker noticed that the neighbor's garage door wouldn't open, and his neighbor was carrying his push lawnmower through his front door. So the speaker asked him what was going on and this- the neighbor said that his garage door was open. The speaker told him that he knew a guy that could fix it for a good price and umm, the neighbor got his garage fixed by this guy that the speaker knew. Umm and then his neighbor offered him the go-kart for thirty dollars even though that it was broken and, umm the speaker chose to buy it and then he fixed up the carburetor on the go-kart and gave it to his son for his birthday and his son was really happy. His son's name was Ethan. Ethan was really happy to receive the go-kart for his birthday and his friends and him had a good time riding the go-kart around and enjoyed that.

| Filler words | Filler other | Nonspeech | Self-monitor | Uptalk | POV switch |
|--------------|--------------|-----------|--------------|--------|------------|
| 6            | 0            | 0         | 3            | 0      | 0          |

|                |            |           |               |                |
|----------------|------------|-----------|---------------|----------------|
| NE_Story_3.wav | 54 seconds | 136 words | 165 syllables | 11 hesitations |
|----------------|------------|-----------|---------------|----------------|

The narrator told a story about umm, when he was younger, he and his friends had heard about this place called Elizabeth's Grave. And they decided to sneak out one night. It was like midnight or one o'clock in the morning and they snuck out. And, it's kind of far away so they had to walk there, and they walked along some train tracks until they got there. Umm and when they arrived at Elizabeth's grave—umm oh- he did say that the moon was bright; it might've been a full moon—umm and they saw a house in the distance, and they got to Elizabeth's Grave. Umm, she might have been killed by her stepfather. And while they were there, they saw ghosts and were spooked, and they like ran away right away. Umm [2-second silence] yeah [laughs].

| Filler words | Filler other | Nonspeech | Self-monitor | Uptalk | POV switch |
|--------------|--------------|-----------|--------------|--------|------------|
| 6            | 3            | 1         | 1            | 0      | 0          |



## Listener 02: NNE stories

|                 |            |           |               |                |
|-----------------|------------|-----------|---------------|----------------|
| NNE_Story_1.wav | 50 seconds | 123 words | 167 syllables | 13 hesitations |
|-----------------|------------|-----------|---------------|----------------|

So there was a man who was talking, and he said that he had a really difficult beginning of his life. Umm he wanted to get into a university, so he was studying this test for like three years. And, umm, he failed it at first and then I guess he kept studying and then he got um an acceptance from the university he wanted. Um he didn't really care about the level of prestige of the university, umm but he did wish that he had spent those three years of his life maybe doing something more meaningful. And he questions- umm, he questions those three years of his life and wonders that- like if he wasted those three years studying. Umm yeah.

| Filler words | Filler other | Nonspeech | Self-monitor | Uptalk | POV switch |
|--------------|--------------|-----------|--------------|--------|------------|
| 7            | 3            | 0         | 2            | 0      | 1          |

|                 |            |          |               |                |
|-----------------|------------|----------|---------------|----------------|
| NNE_Story_2.wav | 48 seconds | 98 words | 126 syllables | 13 hesitations |
|-----------------|------------|----------|---------------|----------------|

Umm so the narrator was telling the listener about how he worked umm, for the U- for the military. And he had the opportunity to work with the troops. Umm he worked with- with them for two years and then umm, [clicks tongue] he met his girlfriend somewhere that he's still dating now. Umm, he got some letters of recommendation to work in a lab? which he is currently working in and he has been for the past five years. Um he's set to graduate in December, and he hopes to get a job and work soon after that. [2-second silence] Yeah [laughs].

| Filler words | Filler other | Nonspeech | Self-monitor | Uptalk | POV switch |
|--------------|--------------|-----------|--------------|--------|------------|
| 6            | 1            | 3         | 2            | 1      | 0          |

|                 |            |           |               |                |
|-----------------|------------|-----------|---------------|----------------|
| NNE_Story_3.wav | 79 seconds | 218 words | 266 syllables | 13 hesitations |
|-----------------|------------|-----------|---------------|----------------|

Umm same guy as the last story was telling a story about a king and his three sons. Um sometime in nineteen-fifty there was a king—um I guess there was not a king in Korea, but there was this king he was talking about. And his- the king's first son was athletic umm but greedy. His second son was more of a scholar type who was really smart but didn't really care much about life. And then the third son, he was the smartest of them all. And that son knew that he was the smartest. And, umm, the man that's telling the story poses this question of like, who would?- who should the king give umm his hierarchy to? Should it be the first, second, or third son? It's the custom to give it to the first son but the third son seems like the most deserving. Umm and then the narrator says, "if it was up to me, I'd give it to the third son because he is the most deserving. However, umm, it shouldn't always be that way. There is a- there's a reason that customs are the way that they are and umm that customs shouldn't be ignored." But he would still give it to the third son because he's the most deserving.

| Filler words | Filler other | Nonspeech | Self-monitor | Uptalk | POV switch |
|--------------|--------------|-----------|--------------|--------|------------|
| 8            | 1            | 0         | 3            | 0      | 1          |

### Listener 03: NE stories

|                                                                                                                                                                                                                                                                                                                                                                                                                                                                      |              |           |               |               |            |
|----------------------------------------------------------------------------------------------------------------------------------------------------------------------------------------------------------------------------------------------------------------------------------------------------------------------------------------------------------------------------------------------------------------------------------------------------------------------|--------------|-----------|---------------|---------------|------------|
| NE_Story_1.wav                                                                                                                                                                                                                                                                                                                                                                                                                                                       | 29 seconds   | 87 words  | 114 syllables | 4 hesitations |            |
| Alright, so this guy in his family wanted to take a trip, but 'cause of COVID, so they rented an SUV, drove down to, uh, Logan, West Virginia. They set up a tent and they went hiking on Rattlesnake Trail where they found a little rattlesnake. Umm but he was chill. And they also rented SUVs and went like driving through the mud. Umm and then they found a box turtle on another trail. And overall, they really liked being in nature; it was a good trip. |              |           |               |               |            |
| Filler words                                                                                                                                                                                                                                                                                                                                                                                                                                                         | Filler other | Nonspeech | Self-monitor  | Uptalk        | POV switch |
| 3                                                                                                                                                                                                                                                                                                                                                                                                                                                                    | 1            | 0         | 0             | 0             | 0          |

|                                                                                                                                                                                                                                                                                                                                                                                                                                                                                                                                                                         |              |           |               |               |            |
|-------------------------------------------------------------------------------------------------------------------------------------------------------------------------------------------------------------------------------------------------------------------------------------------------------------------------------------------------------------------------------------------------------------------------------------------------------------------------------------------------------------------------------------------------------------------------|--------------|-----------|---------------|---------------|------------|
| NE_Story_2.wav                                                                                                                                                                                                                                                                                                                                                                                                                                                                                                                                                          | 31 seconds   | 101 words | 133 syllables | 3 hesitations |            |
| Alright so, he wanted to give his son his neighbor’s go-kart, but the carburetor was broken. Umm and the neighbor didn’t want to give it to him. And then he sees his neighbor carrying his lawnmower through his house [laughs]. And the neighbor says that his garage is- garage door is broken. And the guy says he knows someone who can fix it. He gets it fixed by the friend at a really good price. And then the neighbor is grateful, so he gives him the go-kart for thirty bucks, fixes the carburetor, gives it to his son, and everybody’s happy [laughs]. |              |           |               |               |            |
| Filler words                                                                                                                                                                                                                                                                                                                                                                                                                                                                                                                                                            | Filler other | Nonspeech | Self-monitor  | Uptalk        | POV switch |
| 1                                                                                                                                                                                                                                                                                                                                                                                                                                                                                                                                                                       | 0            | 1         | 1             | 0             | 0          |

|                                                                                                                                                                                                                                                                                                                                                 |              |           |              |               |            |
|-------------------------------------------------------------------------------------------------------------------------------------------------------------------------------------------------------------------------------------------------------------------------------------------------------------------------------------------------|--------------|-----------|--------------|---------------|------------|
| NE_Story_3.wav                                                                                                                                                                                                                                                                                                                                  | 20 seconds   | 60 words  | 76 syllables | 3 hesitations |            |
| Alrighty so when he was twelve, he and his friends went to see, umm Elizabeth’s Grave, which is like that spooky gravesite. Umm in the middle of the night, they walked across some train tracks and went to the grave. And they saw the house where she was supposedly murdered by her stepfather, and they think they saw her ghost [laughs]. |              |           |              |               |            |
| Filler words                                                                                                                                                                                                                                                                                                                                    | Filler other | Nonspeech | Self-monitor | Uptalk        | POV switch |
| 2                                                                                                                                                                                                                                                                                                                                               | 1            | 0         | 0            | 0             | 0          |



### Listener 03: NNE stories

|                                                                                                                                                                                                                                                                       |              |           |              |               |            |
|-----------------------------------------------------------------------------------------------------------------------------------------------------------------------------------------------------------------------------------------------------------------------|--------------|-----------|--------------|---------------|------------|
| NNE_Story_1.wav                                                                                                                                                                                                                                                       | 17 seconds   | 49 words  | 62 syllables | 1 hesitations |            |
| So in Korea, there's a hard entrance exam for university. And he dropped out of high school and tried to study for himself. And he failed twice and then after three years, he got in and he regrets wasting those years when he was nineteen to twenty-two, I think. |              |           |              |               |            |
| Filler words                                                                                                                                                                                                                                                          | Filler other | Nonspeech | Self-monitor | Uptalk        | POV switch |
| 0                                                                                                                                                                                                                                                                     | 0            | 0         | 0            | 0             | 1          |

|                                                                                                                                                                                                                                                                                                        |              |           |              |               |            |
|--------------------------------------------------------------------------------------------------------------------------------------------------------------------------------------------------------------------------------------------------------------------------------------------------------|--------------|-----------|--------------|---------------|------------|
| NNE_Story_2.wav                                                                                                                                                                                                                                                                                        | 19 seconds   | 57 words  | 72 syllables | 0 hesitations |            |
| So, he worked with the military for two years, he got acquainted with US troops, did foreign exchange and met his girlfriend there and did research there. And then he was able to go to grad school in the States for five years. And now he has to defend his dissertation and is looking for a job. |              |           |              |               |            |
| Filler words                                                                                                                                                                                                                                                                                           | Filler other | Nonspeech | Self-monitor | Uptalk        | POV switch |
| 0                                                                                                                                                                                                                                                                                                      | 0            | 0         | 0            | 0             | 0          |

|                                                                                                                                                                                                                                                                                                                                                                                     |              |           |              |               |            |
|-------------------------------------------------------------------------------------------------------------------------------------------------------------------------------------------------------------------------------------------------------------------------------------------------------------------------------------------------------------------------------------|--------------|-----------|--------------|---------------|------------|
| NNE_Story_3.wav                                                                                                                                                                                                                                                                                                                                                                     | 22 seconds   | 71 words  | 93 syllables | 2 hesitations |            |
| So, the king had three sons: a greedy one who was big and strong; a smart one who was more interested in scholarly philosophy; and then the third one who was smart and interested in politics. And he wanted to give his- his kingdom and his throne to the third one, but the traditions kind of say that you give it to the first one. So, there's some controversy behind that. |              |           |              |               |            |
| Filler words                                                                                                                                                                                                                                                                                                                                                                        | Filler other | Nonspeech | Self-monitor | Uptalk        | POV switch |
| 0                                                                                                                                                                                                                                                                                                                                                                                   | 1            | 0         | 1            | 0             | 0          |

### Listener 04: NE stories

|                                                                                                                                                                                                                                                                                                                                                          |              |            |              |              |                |
|----------------------------------------------------------------------------------------------------------------------------------------------------------------------------------------------------------------------------------------------------------------------------------------------------------------------------------------------------------|--------------|------------|--------------|--------------|----------------|
| Listener 6 W NE stories                                                                                                                                                                                                                                                                                                                                  |              |            |              |              |                |
| NE_Story_1.wav                                                                                                                                                                                                                                                                                                                                           |              | 35 seconds | 60 words     | 84 syllables | 11 hesitations |
| <p>Umm, so in twenty-twenty, a family of—I think it said—four, umm went down to Logan, West Virginia. Umm and camped and umm, they did a little hiking; they umm went on Rattlesnake Trail, saw a rattlesnake, umm but it was not a particularly scary encounter. Then they- they said they rented some SUVs? and, umm just enjoyed nature [laughs].</p> |              |            |              |              |                |
| Filler words                                                                                                                                                                                                                                                                                                                                             | Filler other | Nonspeech  | Self-monitor | Uptalk       | POV switch     |
| 7                                                                                                                                                                                                                                                                                                                                                        | 0            | 1          | 1            | 1            | 1              |

|                                                                                                                                                                                                                                                                                                                                                                                                                                                                                                                                                                                                                                                                                                                                                                                                                                                         |              |           |               |                |            |
|---------------------------------------------------------------------------------------------------------------------------------------------------------------------------------------------------------------------------------------------------------------------------------------------------------------------------------------------------------------------------------------------------------------------------------------------------------------------------------------------------------------------------------------------------------------------------------------------------------------------------------------------------------------------------------------------------------------------------------------------------------------------------------------------------------------------------------------------------------|--------------|-----------|---------------|----------------|------------|
| NE_Story_2.wav                                                                                                                                                                                                                                                                                                                                                                                                                                                                                                                                                                                                                                                                                                                                                                                                                                          | 57 seconds   | 158 words | 196 syllables | 11 hesitations |            |
| <p>Umm so for his son's- his son Ethan's thirteenth birthday, he got him a go-kart—which originally belonged to his neighbor, but his neighbor didn't want to sell it to him at first because the carburetor was broken. Uh but then, umm, [clicks tongue] one day, he noticed his neighbor trying to bring his lawnmower out through his front door. And he asked why, and it was because the garage door was broken. Umm so he off- so he said that he knew a guy who could fix it, umm for a good price. And the guy came out that day, fixed the garage and, umm the neighbor was really pleased with that. And I guess because of that, decided to give him the go-kart for thirty dollars. And umm, the guy fixed it up and gave it to his son for his birthday. And he and his friends rode it around the neighborhood and had a lot of fun.</p> |              |           |               |                |            |
| Filler words                                                                                                                                                                                                                                                                                                                                                                                                                                                                                                                                                                                                                                                                                                                                                                                                                                            | Filler other | Nonspeech | Self-monitor  | Uptalk         | POV switch |
| 7                                                                                                                                                                                                                                                                                                                                                                                                                                                                                                                                                                                                                                                                                                                                                                                                                                                       | 0            | 1         | 2             | 0              | 1          |

|                                                                                                                                                                                                                                                                                                                                                                                                                                                                                                                                                    |              |           |               |               |            |
|----------------------------------------------------------------------------------------------------------------------------------------------------------------------------------------------------------------------------------------------------------------------------------------------------------------------------------------------------------------------------------------------------------------------------------------------------------------------------------------------------------------------------------------------------|--------------|-----------|---------------|---------------|------------|
| NE_Story_3.wav                                                                                                                                                                                                                                                                                                                                                                                                                                                                                                                                     | 38 seconds   | 95 words  | 123 syllables | 7 hesitations |            |
| <div>Um when this guy was younger, he and his friends heard of this place called Elizabeth’s Grave. Umm, I guess it was an urban legend and they wanted to be scared, so they all decided to go down there and check it out. And umm, they got there and they saw the grave and supposedly the area where Elizabeth lived. And, as the legend goes, she was killed by her stepfather. And umm [clicks tongue] they ended up thinking that they saw a ghost or a spirit or something. Umm they all freaked out and immediately left [laughs].</div> |              |           |               |               |            |
| Filler words                                                                                                                                                                                                                                                                                                                                                                                                                                                                                                                                       | Filler other | Nonspeech | Self-monitor  | Uptalk        | POV switch |
| 5                                                                                                                                                                                                                                                                                                                                                                                                                                                                                                                                                  | 0            | 1         | 0             | 0             | 1          |

### Listener 04: NNE stories

|                                                                                                                                                                                                                                                                                                                                                                                                                                                                                    |              |            |              |               |               |
|------------------------------------------------------------------------------------------------------------------------------------------------------------------------------------------------------------------------------------------------------------------------------------------------------------------------------------------------------------------------------------------------------------------------------------------------------------------------------------|--------------|------------|--------------|---------------|---------------|
| L1: NNE_Story_1                                                                                                                                                                                                                                                                                                                                                                                                                                                                    |              |            |              |               |               |
| NNE_Story_1.wav                                                                                                                                                                                                                                                                                                                                                                                                                                                                    |              | 36 seconds | 90 words     | 120 syllables | 7 hesitations |
| <p>Umm, so this guy was talking about the entrance exams for um university in Korea? and umm how he had a very difficult time with them—sounds like he had to take it multiple times over the span of a few years? and umm, ended up not getting his first choice. Umm, but he ended up learning from the whole experience that the prestige of the university didn't matter quite as much as he thought it did. And he wished that he had spent that time in a different way.</p> |              |            |              |               |               |
| Filler words                                                                                                                                                                                                                                                                                                                                                                                                                                                                       | Filler other | Nonspeech  | Self-monitor | Uptalk        | POV switch    |
| 5                                                                                                                                                                                                                                                                                                                                                                                                                                                                                  | 0            | 0          | 0            | 2             | 0             |

|                                                                                                                                                                                                                                                                                                                                                                                                                                                                                                                                                                                                                                                                        |              |           |               |                |            |
|------------------------------------------------------------------------------------------------------------------------------------------------------------------------------------------------------------------------------------------------------------------------------------------------------------------------------------------------------------------------------------------------------------------------------------------------------------------------------------------------------------------------------------------------------------------------------------------------------------------------------------------------------------------------|--------------|-----------|---------------|----------------|------------|
| NNE_Story_2.wav                                                                                                                                                                                                                                                                                                                                                                                                                                                                                                                                                                                                                                                        | 53 seconds   | 119 words | 161 syllables | 15 hesitations |            |
| So this guy was a part of military for two years umm, which he wouldn't have liked very much, except he had the opportunity to work with US soldiers and that um allowed him to learn English. Umm, and from that, he umm had an opportunity to be a part of a- a foreign exchange program, umm where he met uh his girlfriend, who he's still dating and umm, was involved in research and umm got letters of recommendation which allowed him to apply to grad school. Umm, sounds like he's still doing that and will soon be uh doing his dissertation defense [laughs]. Umm and umm he's looking forward to graduating and hopefully finding a job soon [laughs]. |              |           |               |                |            |
| Filler words                                                                                                                                                                                                                                                                                                                                                                                                                                                                                                                                                                                                                                                           | Filler other | Nonspeech | Self-monitor  | Uptalk         | POV switch |
| 12                                                                                                                                                                                                                                                                                                                                                                                                                                                                                                                                                                                                                                                                     | 0            | 2         | 1             | 0              | 0          |

|                                                                                                                                                                                                                                                                                                                                                                                                                                                                                                                                                                                                   |              |           |               |                |            |
|---------------------------------------------------------------------------------------------------------------------------------------------------------------------------------------------------------------------------------------------------------------------------------------------------------------------------------------------------------------------------------------------------------------------------------------------------------------------------------------------------------------------------------------------------------------------------------------------------|--------------|-----------|---------------|----------------|------------|
| NNE_Story_3.wav                                                                                                                                                                                                                                                                                                                                                                                                                                                                                                                                                                                   | 49 seconds   | 109 words | 144 syllables | 15 hesitations |            |
| <p>Umm, so there was a king and he had three sons. Umm the oldest umm, was athletic umm but I guess not suited to the position. The second was fairly intelligent but not interested; umm he's more interested in umm, religion and I guess he was described as a scholar. The- and the third son was most suited to the job umm. He had a good sense of politics. Umm but traditionally, the king would have to, umm pass down the position to the oldest son, uh even though he didn't want to do this because the third sign was most suited. Umm that's where the story cut off [laughs].</p> |              |           |               |                |            |
| Filler words                                                                                                                                                                                                                                                                                                                                                                                                                                                                                                                                                                                      | Filler other | Nonspeech | Self-monitor  | Uptalk         | POV switch |
| 11                                                                                                                                                                                                                                                                                                                                                                                                                                                                                                                                                                                                | 0            | 1         | 1             | 0              | 2          |

### Listener 05: NE stories

|                                                                                                                                                                                                                                                                                                                                                                                                                                               |              |            |              |               |               |
|-----------------------------------------------------------------------------------------------------------------------------------------------------------------------------------------------------------------------------------------------------------------------------------------------------------------------------------------------------------------------------------------------------------------------------------------------|--------------|------------|--------------|---------------|---------------|
| EASTONER COVID STORIES                                                                                                                                                                                                                                                                                                                                                                                                                        |              |            |              |               |               |
| NE_Story_1.wav                                                                                                                                                                                                                                                                                                                                                                                                                                |              | 34 seconds | 82 words     | 111 syllables | 5 hesitations |
| <div>Umm so this guy was talking about umm the year of twenty-twenty. He said that him and his family went umm on a vacation in May to get away from COVID and to be outdoors. So they went to Logan, West Virginia umm where they went on a bunch of different hikes. One where they saw a rattlesnake—umm but it didn't hurt them—and another where they saved a box turtle, and another where they rented SUVs and got really muddy.</div> |              |            |              |               |               |
| Filler words                                                                                                                                                                                                                                                                                                                                                                                                                                  | Filler other | Nonspeech  | Self-monitor | Uptalk        | POV switch    |
| 5                                                                                                                                                                                                                                                                                                                                                                                                                                             | 0            | 0          | 0            | 0             | 0             |

|                                                                                                                                                                                                                                                                                                                                                                                                                                                                                                                                                                                                                                                      |              |           |               |               |            |
|------------------------------------------------------------------------------------------------------------------------------------------------------------------------------------------------------------------------------------------------------------------------------------------------------------------------------------------------------------------------------------------------------------------------------------------------------------------------------------------------------------------------------------------------------------------------------------------------------------------------------------------------------|--------------|-----------|---------------|---------------|------------|
| NE_Story_2.wav                                                                                                                                                                                                                                                                                                                                                                                                                                                                                                                                                                                                                                       | 47 seconds   | 122 words | 157 syllables | 9 hesitations |            |
| <p>Umm so this guy wanted to get his son, Ethan, a birthday present for his thirteenth birthday. Umm his neighbor had a go-kart, but it was- the carburetor was broken in it. Umm, then the dad saw the neighbor like carrying his push mower through his house and out the front door and he asked him why. And um he told him that his garage door was broken. So, the dad umm, called somebody to fix his garage for him. And the neighbor was really happy with that, so he decided to sell him the broken go-kart for thirty dollars, and h- the dad fixed the broken go-kart, uhh gave it to his son and his son was really happy with it.</p> |              |           |               |               |            |
| Filler words                                                                                                                                                                                                                                                                                                                                                                                                                                                                                                                                                                                                                                         | Filler other | Nonspeech | Self-monitor  | Uptalk        | POV switch |
| 6                                                                                                                                                                                                                                                                                                                                                                                                                                                                                                                                                                                                                                                    | 1            | 0         | 2             | 0             | 0          |

|                                                                                                                                                                                                                                                                                                                                                                                                                                                                                                                                                                         |              |           |               |               |            |
|-------------------------------------------------------------------------------------------------------------------------------------------------------------------------------------------------------------------------------------------------------------------------------------------------------------------------------------------------------------------------------------------------------------------------------------------------------------------------------------------------------------------------------------------------------------------------|--------------|-----------|---------------|---------------|------------|
| NE_Story_3.wav                                                                                                                                                                                                                                                                                                                                                                                                                                                                                                                                                          | 36 seconds   | 103 words | 128 syllables | 7 hesitations |            |
| <div>Umm so this guy was telling a story about when he was twelve years old, and him and his buddies went to this place called Elizabeth's Grave because they wanted to be scared. Umm so they went down, uhh at like midnight or one AM, and they like walked on the train tracks and the moon was really bright. Umm and they got there and they saw the gravesite, and they saw a little house where Elizabeth supposedly lived, and she had been killed by her stepfather. Umm and then they thought they saw a ghost or something, got scared, and ran away.</div> |              |           |               |               |            |
| Filler words                                                                                                                                                                                                                                                                                                                                                                                                                                                                                                                                                            | Filler other | Nonspeech | Self-monitor  | Uptalk        | POV switch |
| 5                                                                                                                                                                                                                                                                                                                                                                                                                                                                                                                                                                       | 2            | 0         | 0             | 0             | 0          |

### Listener 05: NNE stories

|                                                                                                                                                                                                                                                                                            |              |           |              |               |            |
|--------------------------------------------------------------------------------------------------------------------------------------------------------------------------------------------------------------------------------------------------------------------------------------------|--------------|-----------|--------------|---------------|------------|
| NNE_Story_1.wav                                                                                                                                                                                                                                                                            | 25 seconds   | 52 words  | 66 syllables | 5 hesitations |            |
| <u>Umm</u> so the guy was talking about how he took a year off from high school to do his own studies to hopefully get into college, and he tried two or three times, <u>umm</u> , and spent time at college but <u>uh</u> then ended up <u>kind of</u> regretting it but also missing it? |              |           |              |               |            |
| Filler words                                                                                                                                                                                                                                                                               | Filler other | Nonspeech | Self-monitor | Uptalk        | POV switch |
| 3                                                                                                                                                                                                                                                                                          | 1            | 0         | 0            | 1             | 0          |

|                                                                                                                                                                                                                                                                                                                                         |              |           |              |               |            |
|-----------------------------------------------------------------------------------------------------------------------------------------------------------------------------------------------------------------------------------------------------------------------------------------------------------------------------------------|--------------|-----------|--------------|---------------|------------|
| NNE_Story_2.wav                                                                                                                                                                                                                                                                                                                         | 31 seconds   | 55 words  | 73 syllables | 7 hesitations |            |
| <u>Umm</u> so the guy was in the military in a country abroad, and he was going to school, <u>uh</u> where he met his girlfriend, and he got a letter of recommendation from a teacher <u>who-</u> which allowed him to, <u>umm</u> , hopefully be able to go to a school in the US [3-second pause] <u>I think</u> that's it [laughs]. |              |           |              |               |            |
| Filler words                                                                                                                                                                                                                                                                                                                            | Filler other | Nonspeech | Self-monitor | Uptalk        | POV switch |
| 3                                                                                                                                                                                                                                                                                                                                       | 0            | 2         | 1            | 0             | 1          |

|                                                                                                                                                                                                                                                                                                                                                                                                                                                                                                                                |              |           |               |               |            |
|--------------------------------------------------------------------------------------------------------------------------------------------------------------------------------------------------------------------------------------------------------------------------------------------------------------------------------------------------------------------------------------------------------------------------------------------------------------------------------------------------------------------------------|--------------|-----------|---------------|---------------|------------|
| NNE_Story_3.wav                                                                                                                                                                                                                                                                                                                                                                                                                                                                                                                | 38 seconds   | 85 words  | 116 syllables | 9 hesitations |            |
| <u>Umm</u> so the story was about <u>umm</u> a king who had three sons. The first one was <u>umm</u> , big and greedy and the second one was really smart but, <u>umm like</u> didn't apply himself and was really interested in religion. <u>Umm</u> the third one, <u>uhh</u> , he was the better option; he was smarter. <u>Umm</u> and the narrator was discussing <u>like</u> , whether he should pick the first son because that was the traditional thing to do or the third son because that was the smarter decision. |              |           |               |               |            |
| Filler words                                                                                                                                                                                                                                                                                                                                                                                                                                                                                                                   | Filler other | Nonspeech | Self-monitor  | Uptalk        | POV switch |
| 7                                                                                                                                                                                                                                                                                                                                                                                                                                                                                                                              | 2            | 0         | 0             | 0             | 0          |

## Listener 06: NE stories

NE\_Story\_1.wav

40 seconds

109 words

140 syllables

10 hesitations

So this was about a guy who- it was like twenty-twenty in May and he and his family decided to go to West Virginia to like go camping and hiking so they could like have a vacation but like be safe because of COVID. So they went to Logan, West Virginia. And they like set up a tent and went tent camping. And then the first, uh like hike they went on was two miles, and it was Rattlesnake Trail and they saw a rattlesnake. And it like rattled at them. And then they also went on another hike, and they rescued a box turtle from like other people.

Filler words

Filler other

Nonspeech

Self-monitor

Uptalk

POV switch

1

8

0

1

0

0

NE\_Story\_2.wav

64 seconds

154 words

195 syllables

18 hesitations

Okay so, umm this guy wanted to get a um go-kart for his son’s thirteenth birthday. And his neighbor had one, but he didn’t want to sell the go-kart to him because all the parts weren’t fixed. I think like the carburetor needed fixed. Umm and then- umm but then one day he like- the guy saw his umm neighbor carrying a lawnmower through his house instead of like opening the garage door. And he asked his neighbor what he was doing. And they- he said like his garage door was broken so he had his friend come and fix his neighbor’s garage door for a good price. And so then the neighbor was very grateful. And umm, sold the guy his go-kart for thirty dollars. And then umm the guy fixed the carburetor for his son. And then his son and like his buddies like used it to like drive around the neighborhood.

Filler words

Filler other

Nonspeech

Self-monitor

Uptalk

POV switch

7

7

0

3

0

1

NE\_Story\_3.wav

42 seconds

113 words

134 syllables

16 hesitations

So, it was a guy who was telling a story about when he was twelve. And he and his friends heard about this place called Elizabeth Grave- Elizabeth’s Grave. And um it was like supposedly haunted with like evil spirits. So one night they like snuck out of their house at like midnight and they all like met by like the train tracks, and then like, took the train tracks and walked down to like her house. And there was like her house and then a grave and the house is where she was- like lived and she was like killed by her stepfather? and then they like saw a ghost and ran away.

Filler words

Filler other

Nonspeech

Self-monitor

Uptalk

POV switch

1

12

0

2

1

0



## Listener 06: NNE stories

|                                                                                                                                                                                                                                                                                                                                                                                                                                                                                                             |              |            |              |               |                |
|-------------------------------------------------------------------------------------------------------------------------------------------------------------------------------------------------------------------------------------------------------------------------------------------------------------------------------------------------------------------------------------------------------------------------------------------------------------------------------------------------------------|--------------|------------|--------------|---------------|----------------|
| Listener 66: FIVE STORIES                                                                                                                                                                                                                                                                                                                                                                                                                                                                                   |              |            |              |               |                |
| NNE_Story_1.wav                                                                                                                                                                                                                                                                                                                                                                                                                                                                                             |              | 40 seconds | 93 words     | 122 syllables | 18 hesitations |
| <p>Umm, so this person was talking about how he like regretted, um like caring so much about like, the like, the level of prestige like a university had because he like, took like three different tests and then like kept failing them. And then he like didn't get into the university he wanted to. And it was just like very disappointing and he like, spent like so much of his time like focused on it. Umm, and he just regrets that. And then, he says he's like good where he is now. Yeah.</p> |              |            |              |               |                |
| Filler words                                                                                                                                                                                                                                                                                                                                                                                                                                                                                                | Filler other | Nonspeech  | Self-monitor | Uptalk        | POV switch     |
| 3                                                                                                                                                                                                                                                                                                                                                                                                                                                                                                           | 15           | 0          | 0            | 0             | 0              |

|                                                                                                                                                                                                                                                                                                                                                                                                                                                                                                                                                                                                                                                                          |              |           |               |                |            |
|--------------------------------------------------------------------------------------------------------------------------------------------------------------------------------------------------------------------------------------------------------------------------------------------------------------------------------------------------------------------------------------------------------------------------------------------------------------------------------------------------------------------------------------------------------------------------------------------------------------------------------------------------------------------------|--------------|-----------|---------------|----------------|------------|
| NNE_Story_2.wav                                                                                                                                                                                                                                                                                                                                                                                                                                                                                                                                                                                                                                                          | 54 seconds   | 133 words | 155 syllables | 25 hesitations |            |
| <p>Umm so this was, umm somebody telling like, me about like the last like five years of his life. So he—I think he was from Korea—and he umm, like- like the last five years started with like, two years he had to like be in the military for and he said it like sucked and it wasn't a good time but he like- it like helped him get to where he is today. Umm and then he came to the United States as an exchange student and met his girlfriend who he's still dating now. Umm and then he has been at Ohio State, and he's been working toward his like PhD, umm and he like has his l- own lab and he's like going to defend his dissertation? soon. Yeah.</p> |              |           |               |                |            |
| Filler words                                                                                                                                                                                                                                                                                                                                                                                                                                                                                                                                                                                                                                                             | Filler other | Nonspeech | Self-monitor  | Uptalk         | POV switch |
| 6                                                                                                                                                                                                                                                                                                                                                                                                                                                                                                                                                                                                                                                                        | 14           | 0         | 3             | 1              | 1          |

|                                                                                                                                                                                                                                                                                                                                                                                                                                                                                                                                                                                                                                                                                                                                                                                                                                                                        |              |           |               |                |            |
|------------------------------------------------------------------------------------------------------------------------------------------------------------------------------------------------------------------------------------------------------------------------------------------------------------------------------------------------------------------------------------------------------------------------------------------------------------------------------------------------------------------------------------------------------------------------------------------------------------------------------------------------------------------------------------------------------------------------------------------------------------------------------------------------------------------------------------------------------------------------|--------------|-----------|---------------|----------------|------------|
| NNE_Story_3.wav                                                                                                                                                                                                                                                                                                                                                                                                                                                                                                                                                                                                                                                                                                                                                                                                                                                        | 59 seconds   | 163 words | 195 syllables | 34 hesitations |            |
| <p>Umm, so this was somebody who was talking about how- like how kings usually like, umm give like their like everything to their like firstborn, but the king was kind of like- didn't know what to do because the first son was like, more athletic but like not very smart. And then like the second one was like, smart but he like didn't really care. And then like his like, favorite son I guess? and like who we thought would make the best king was his third son because he was like smart and he was- he like also cared. And so then he was like asking like, "what would you do in that like situation like, would you like break the custom of like giving everything to the first son or would do you like, give everything to the third son so he could like rule after, like he like died?" Umm and then he said he would choose the third son.</p> |              |           |               |                |            |
| Filler words                                                                                                                                                                                                                                                                                                                                                                                                                                                                                                                                                                                                                                                                                                                                                                                                                                                           | Filler other | Nonspeech | Self-monitor  | Uptalk         | POV switch |
| 3                                                                                                                                                                                                                                                                                                                                                                                                                                                                                                                                                                                                                                                                                                                                                                                                                                                                      | 26           | 0         | 3             | 1              | 1          |

## Listener 07: NE stories

|                                                                                                                                                                                                                                                                                                                                                                                                                                             |              |           |               |                |            |
|---------------------------------------------------------------------------------------------------------------------------------------------------------------------------------------------------------------------------------------------------------------------------------------------------------------------------------------------------------------------------------------------------------------------------------------------|--------------|-----------|---------------|----------------|------------|
| NE_Story_1.wav                                                                                                                                                                                                                                                                                                                                                                                                                              | 35 seconds   | 87 words  | 111 syllables | 13 hesitations |            |
| <p>Umm so there's a guy who took his wife, uh Lynn, and his two sons, umm to West Virginia for a little vacation so they would be kind of secluded umm from everyone due to COVID. Umm I believe it was in Logan, West Virginia? Umm and on one of the hikes, they came across a rattlesnake? And then on the other hike, um they came across a box turtle. And overall, he, I think he said, umm it was just nice to be out in nature.</p> |              |           |               |                |            |
| Filler words                                                                                                                                                                                                                                                                                                                                                                                                                                | Filler other | Nonspeech | Self-monitor  | Uptalk         | POV switch |
| 8                                                                                                                                                                                                                                                                                                                                                                                                                                           | 1            | 0         | 0             | 2              | 2          |

|                                                                                                                                                                                                                                                                                                                                                                                                                                                                                                                                                                                                                  |              |           |               |                |            |
|------------------------------------------------------------------------------------------------------------------------------------------------------------------------------------------------------------------------------------------------------------------------------------------------------------------------------------------------------------------------------------------------------------------------------------------------------------------------------------------------------------------------------------------------------------------------------------------------------------------|--------------|-----------|---------------|----------------|------------|
| NE_Story_2.wav                                                                                                                                                                                                                                                                                                                                                                                                                                                                                                                                                                                                   | 45 seconds   | 116 words | 146 syllables | 15 hesitations |            |
| And then the second one, he wanted to buy something I believe for his son's birthday. Umm, and so he asked his neighbor? maybe? Umm and then he was telling like an anecdote about how he saw his neighbor carrying his umm lawnmower through his house, out his front door. And he asked him why he was doing that because that was kind of strange. Umm, and he said because his garage door was broken, I think. Umm and then he ended up buying um a go-kart for his son for thirty dollars and said that was like the best thirty dollars he spent umm because of uhh like how much fun his son was having. |              |           |               |                |            |
| Filler words                                                                                                                                                                                                                                                                                                                                                                                                                                                                                                                                                                                                     | Filler other | Nonspeech | Self-monitor  | Uptalk         | POV switch |
| 8                                                                                                                                                                                                                                                                                                                                                                                                                                                                                                                                                                                                                | 4            | 0         | 0             | 1              | 2          |

|                                                                                                                                                                                                                                                                                                                                          |              |           |              |               |            |
|------------------------------------------------------------------------------------------------------------------------------------------------------------------------------------------------------------------------------------------------------------------------------------------------------------------------------------------|--------------|-----------|--------------|---------------|------------|
| NE_Story_3.wav                                                                                                                                                                                                                                                                                                                           | 34 seconds   | words     | syllables    | 9 hesitations |            |
| <div>Umm so the guy talking was remembering a story about when he was a kid. Umm about how he and his friends, umm, walked down to Elizabeth's Grave? umm and he like saw the house and her grave and apparently, she was murdered by her stepdad. Umm, and they saw a ghost and uh they were just really scared [laughs] I guess.</div> |              |           |              |               |            |
| Filler words                                                                                                                                                                                                                                                                                                                             | Filler other | Nonspeech | Self-monitor | Uptalk        | POV switch |
| 6                                                                                                                                                                                                                                                                                                                                        | 1            | 0         | 0            | 1             | 1          |

### Listener 07: NNE stories

|                                                                                                                                                                                                                                                                                                                                                                                                                                                                                                                                                                                                                                                                                                                                               |              |           |               |                |            |
|-----------------------------------------------------------------------------------------------------------------------------------------------------------------------------------------------------------------------------------------------------------------------------------------------------------------------------------------------------------------------------------------------------------------------------------------------------------------------------------------------------------------------------------------------------------------------------------------------------------------------------------------------------------------------------------------------------------------------------------------------|--------------|-----------|---------------|----------------|------------|
| Listener 04: NNE stories                                                                                                                                                                                                                                                                                                                                                                                                                                                                                                                                                                                                                                                                                                                      |              |           |               |                |            |
| NNE_Story_1.wav                                                                                                                                                                                                                                                                                                                                                                                                                                                                                                                                                                                                                                                                                                                               | 54 seconds   | 133 words | 174 syllables | 25 hesitations |            |
| <p>Umm so there's a guy talking about how- um just like about his struggles, um about getting into university. Umm and he's- took the test twice and failed both times umm and then kept studying and took it a third time. Umm and he was just saying that he regrets um all that time spent studying, umm he said he was like between nineteen and twenty-two years old, and I think umm he just regrets like, I guess wasting his youth umm [laughs] studying umm because he was trying to get into such a prestigious university and realized that that didn't matter umm as much as he once thought. So if he were to go back and do it again, umm he wouldn't have, umm like wasted his time studying that much I guess [laughs].</p>   |              |           |               |                |            |
| Filler words                                                                                                                                                                                                                                                                                                                                                                                                                                                                                                                                                                                                                                                                                                                                  | Filler other | Nonspeech | Self-monitor  | Uptalk         | POV switch |
| 14                                                                                                                                                                                                                                                                                                                                                                                                                                                                                                                                                                                                                                                                                                                                            | 4            | 2         | 2             | 0              | 3          |
|                                                                                                                                                                                                                                                                                                                                                                                                                                                                                                                                                                                                                                                                                                                                               |              |           |               |                |            |
| NNE_Story_2.wav                                                                                                                                                                                                                                                                                                                                                                                                                                                                                                                                                                                                                                                                                                                               | 57 seconds   | 135 words | 170 syllables | 20 hesitations |            |
| <p>Umm so he was talking about how, I believe he spent two years in or serving in the military umm and that's where he learned umm or became more familiar with speaking English? Umm then he said he met his girlfriend. Umm unclear if that was in the mil- military or not. Umm, and then he moved to the United States umm [clicks tongue], for school and now he is in his PhD program um and was saying that- or just talking about um how he has to defend his thesis soon and how he is planning on graduating in December. Umm and I think he's unclear of what he's go- like what that's going to look like afterwards if he's going to find a job, umm but he said he is trying his best [laughs].</p>                             |              |           |               |                |            |
| Filler words                                                                                                                                                                                                                                                                                                                                                                                                                                                                                                                                                                                                                                                                                                                                  | Filler other | Nonspeech | Self-monitor  | Uptalk         | POV switch |
| 11                                                                                                                                                                                                                                                                                                                                                                                                                                                                                                                                                                                                                                                                                                                                            | 1            | 2         | 3             | 1              | 2          |
|                                                                                                                                                                                                                                                                                                                                                                                                                                                                                                                                                                                                                                                                                                                                               |              |           |               |                |            |
| NNE_Story_3.wav                                                                                                                                                                                                                                                                                                                                                                                                                                                                                                                                                                                                                                                                                                                               | 58 seconds   | 137 words | 182 syllables | 18 hesitations |            |
| <p>So he's talking about a king, umm in Korea back in the nineteen-fifties, and he had three sons and the oldest son was really athletic umm but didn't really have like many interests or like drive. Umm and the second son was smart umm and interested in history and religion. But the third son was the smartest and interested in politics. Umm however umm, the king has to give up—or like when it comes time umm, to like switch power I guess? um it has to go to the oldest son, even though umm the third son is probably the most qualified. So, uh the king was just struggling with that and knew that umm there would be some conflict, umm, because he wanted to choose his third son and not his first and oldest son.</p> |              |           |               |                |            |
| Filler words                                                                                                                                                                                                                                                                                                                                                                                                                                                                                                                                                                                                                                                                                                                                  | Filler other | Nonspeech | Self-monitor  | Uptalk         | POV switch |
| 12                                                                                                                                                                                                                                                                                                                                                                                                                                                                                                                                                                                                                                                                                                                                            | 4            | 0         | 0             | 1              | 1          |
