# Supplementary material
Source: publisher figshare collection journal article supplement (https://asha.figshare.com/articles/dataset/_/25452142)
Supplement: Supplementary file 2 [file 1]

### Supplemental Material S3. Types of hesitations in story retellings with their definitions and examples.

Each hesitation type is assigned a different color and this color scheme is followed in the transcriptions (see Supplemental Material S4) to locate hesitations included in statistical analyses.

| Phenomenon                                 | Definition                                                                                                                             | Example                                                                                             |
|--------------------------------------------|----------------------------------------------------------------------------------------------------------------------------------------|-----------------------------------------------------------------------------------------------------|
| Filler words                               | Any instances of “uh,” “uhh,” “um,” “umm”                                                                                              | “He’s been working toward his like PhD <u>umm</u> and he like has his own lab.”                     |
| Filler other                               | Words and phrases that are not strictly filler words; e.g., non-functional instances of “like,” “yeah,” “well,” “alright”              | “It was just <u>kind of</u> sitting in his garage for six months.”                                  |
| Nonspeech fillers                          | Sounds that are not speech, specifically laughter in non-humorous contexts, tongue clicking, and silent pauses with a duration >200 ms | “He just regrets like, I guess wasting his youth umm [ <u>laughs</u> ] studying.”                   |
| Self-monitoring: repetitions and revisions | Restarts, repairs, etc.                                                                                                                | “ <u>There is a-</u> <u>there’s a</u> reason that customs are the way that they are.”               |
| Uptalk                                     | Rising intonation in a non-interrogative context                                                                                       | “They had heard of this place called Elizabeth’s <u>Grave?</u> where allegedly there were spirits.” |
| Point of view switching                    | Switching from third-person to first-person narration, specifically “I think” and “I guess”                                            | “A family of—I <u>think</u> it said—four umm went down to Logan, West Virginia.”                    |
